# Supplementary material for: Polymorphisms in methotrexate transporters and their relationship to plasma methotrexate levels, toxicity of high-dose methotrexate, and outcome of pediatric acute lymphoblastic leukemia
Source: PubMed Central journal article supplement (PMC5514947; doi:10.18632/oncotarget.17781), 2017-05-10
Supplement: oncotarget-08-37761-s001.pdf [file oncotarget-08-37761-s001.pdf]

# Polymorphisms in methotrexate transporters and their relationship to plasma methotrexate levels, toxicity of high-dose methotrexate, and outcome of pediatric acute lymphoblastic leukemia

## Supplementary Materials

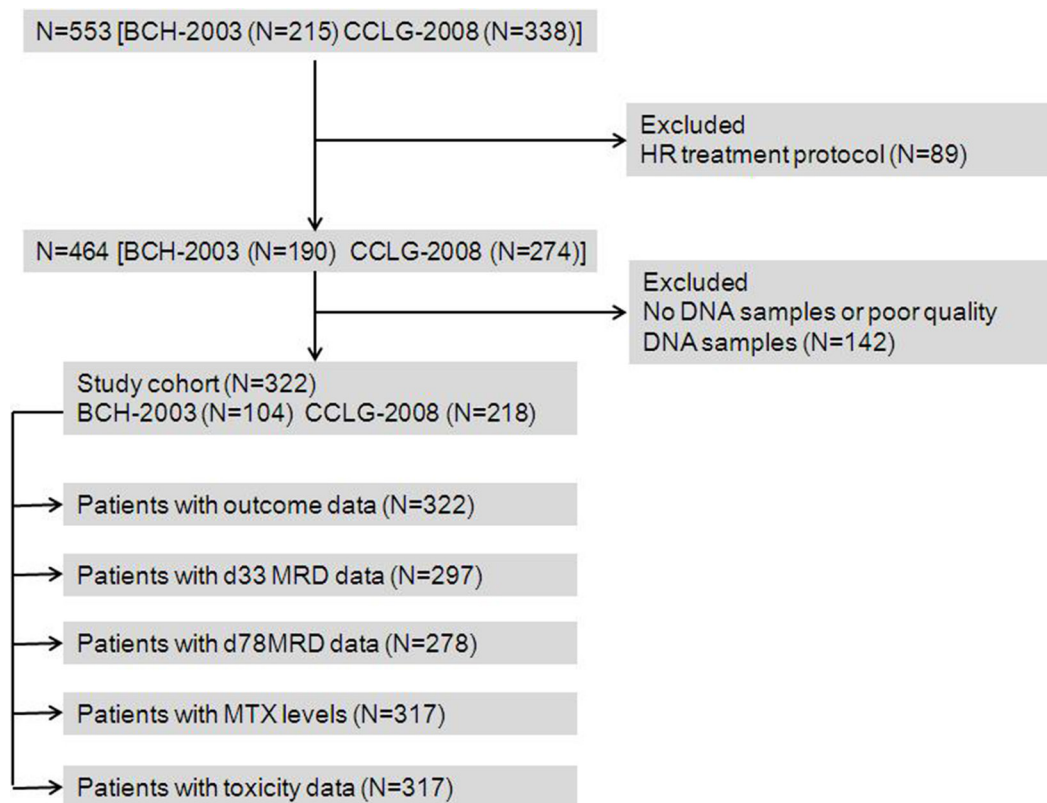

Supplementary Figure 1: Flow chart of patients included in this analysis.

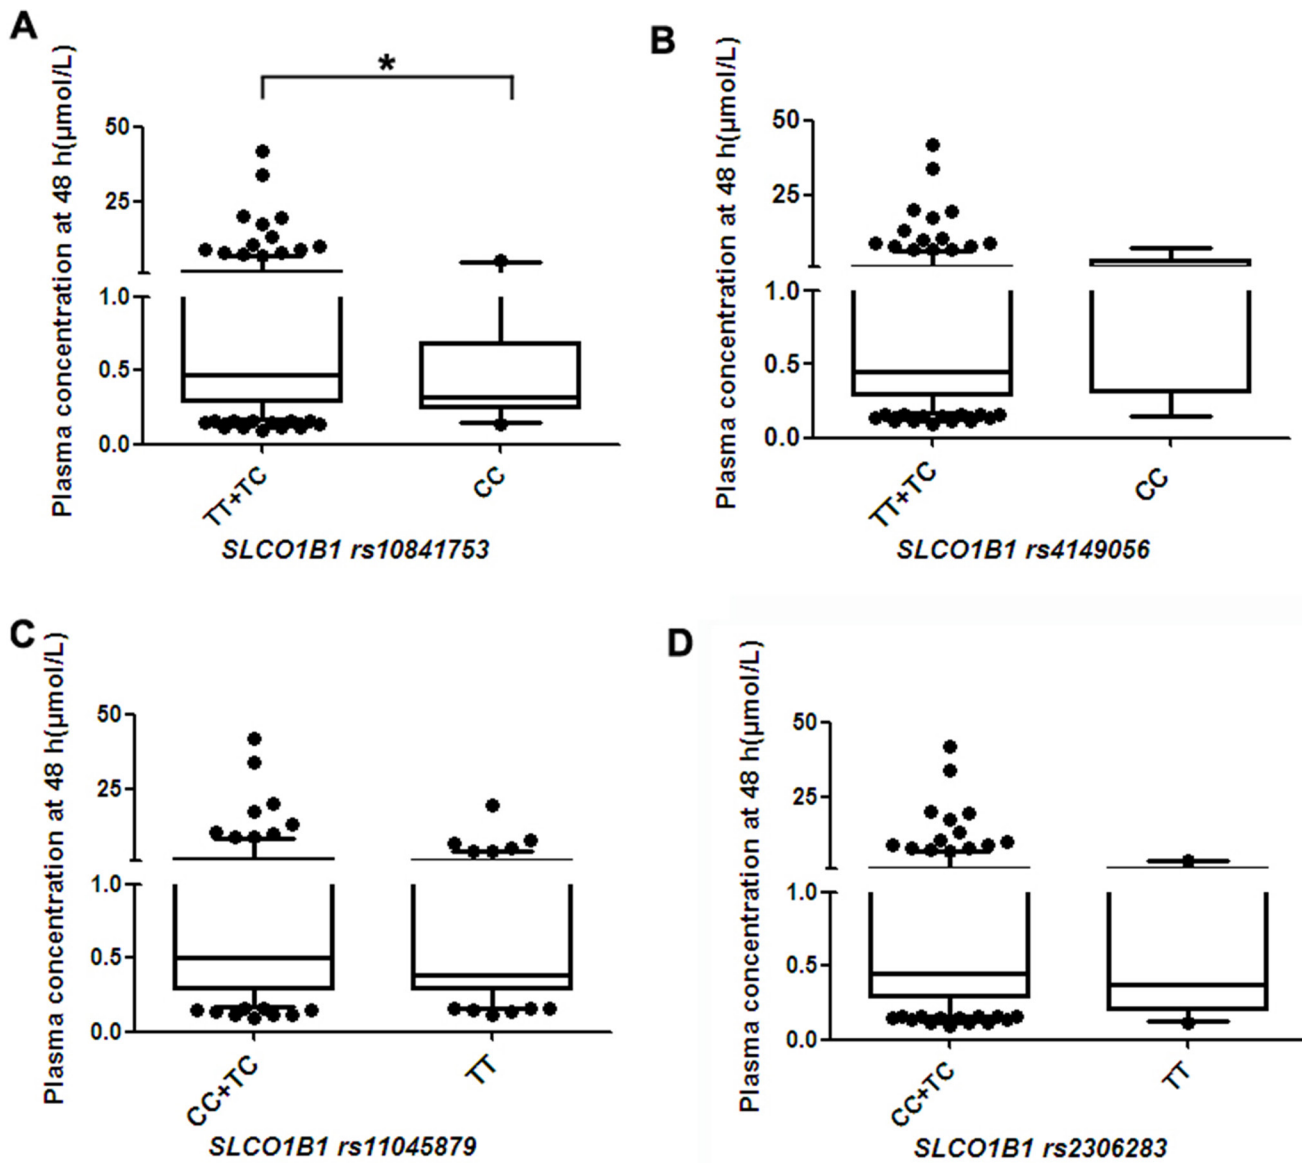

**Supplementary Figure 2: *SLCO1B1* polymorphisms and MTX plasma concentration at 48 h.** Median is indicated by horizontal line. Boxes indicate 5th–95th percentile. The black dots indicate outliers. \* indicates  $P < 0.05$ . (A) *SLCO1B1* rs10841753 variants and plasma MTX levels. (B) *SLCO1B1* rs4149056 variants and plasma MTX levels. (C) *SLCO1B1* rs11045879 variants and plasma MTX levels. (D) *SLCO1B1* rs2306283 variants and plasma MTX levels.

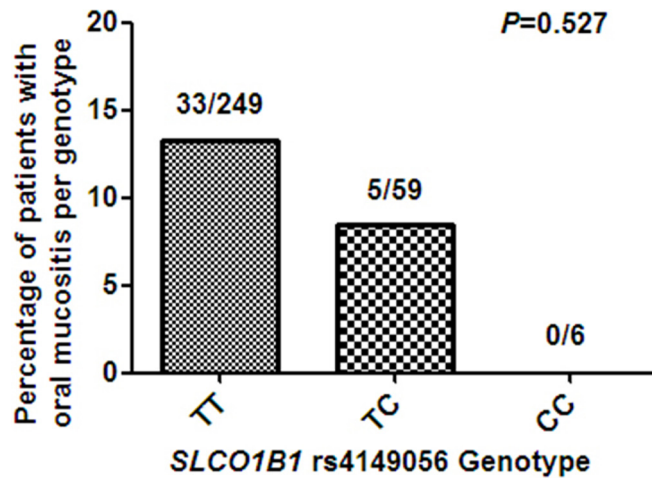

**Supplementary Figure 3:** *SLCO1B1* rs4149056 and the occurrence of oral mucositis during consolidation therapy. The bar graphs display the percentage of patients who suffered oral mucositis. Numbers above each bar represent the numbers of patients who suffered mucositis vs. the total number of patients for the specific genotype.

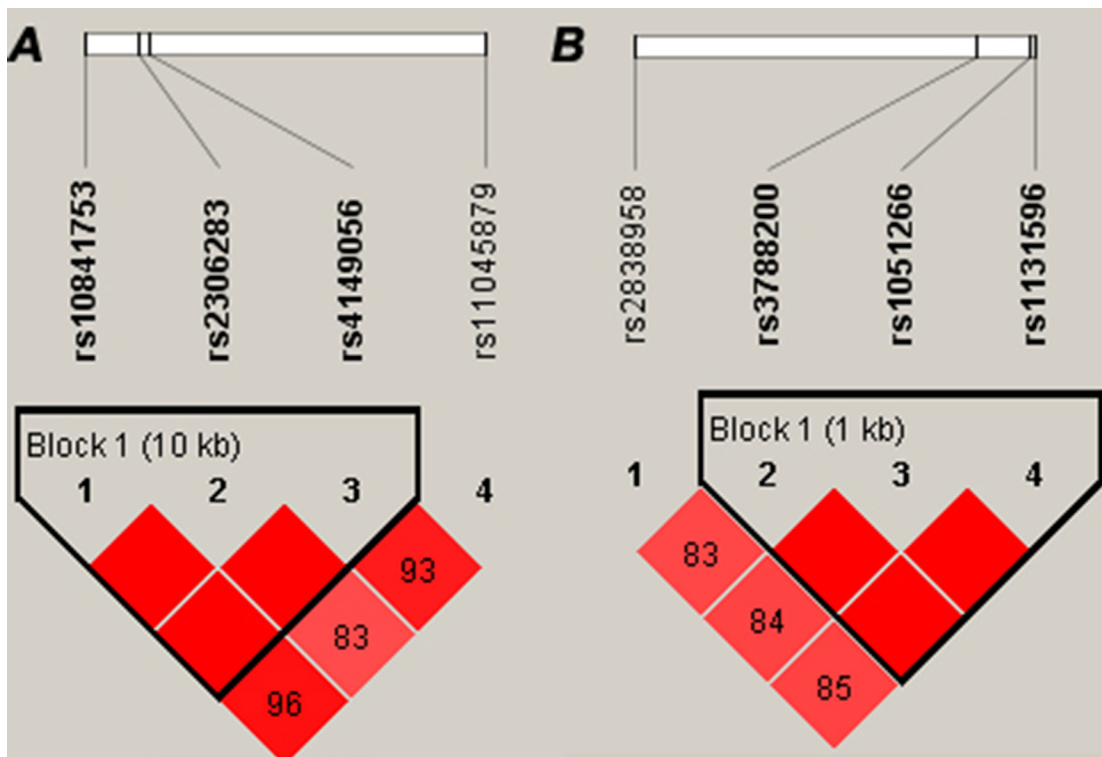

**Supplementary Figure 4:** Gene map and linkage disequilibrium plot of *SLCO1B1* (A) and *SLC19A1* (B). Numbers in squares are *D*-values.

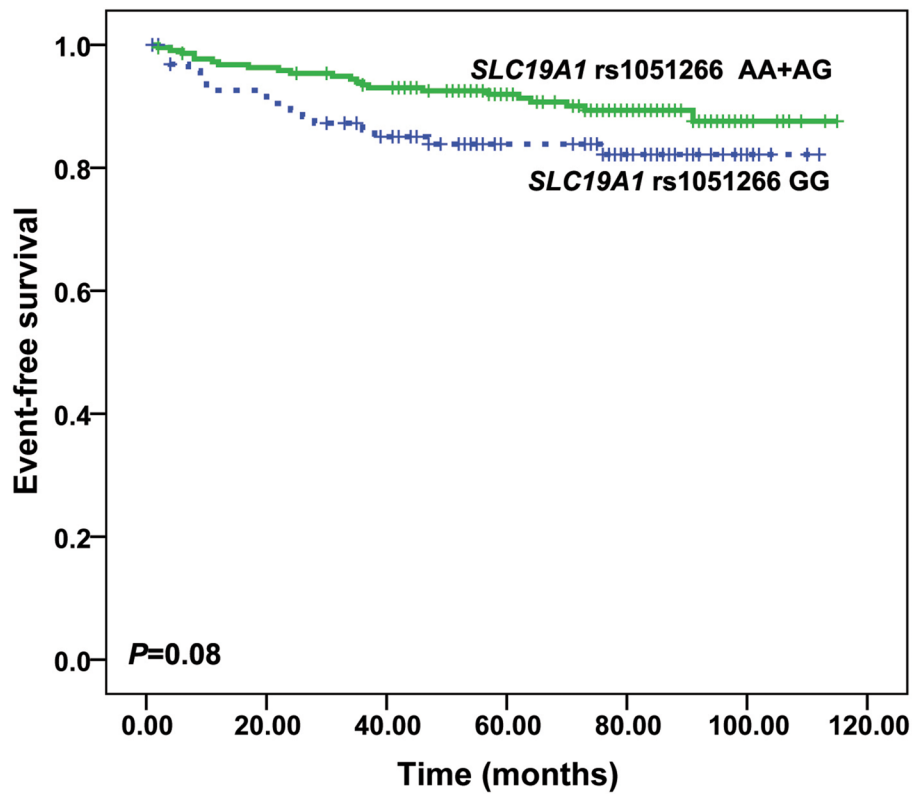

**Supplementary Figure 5: *SLC19A1* rs1051266 polymorphism and event-free survival (EFS).** The Kaplan-Meier survival curve is shown to visualize the difference between the *SLC19A1* rs1051266 GG variant and AA/AG variants (log-rank  $P = 0.08$ ).

**Supplementary Table 1: Patient characteristics**

| Patient characteristics  | BCH-2003 and CCLG-2008 participants with SR and IR risk analyzed | BCH-2003 and CCLG-2008 participants with SR and IR risk not analyzed | <i>P</i> |
|--------------------------|------------------------------------------------------------------|----------------------------------------------------------------------|----------|
| Total number of patients | 322                                                              | 142                                                                  |          |
| Age                      |                                                                  |                                                                      |          |
| < 10 y n (%)             | 268 (83.2)                                                       | 127 (89.4)                                                           | 0.090    |
| ≥ 10 y n (%)             | 54 (16.8)                                                        | 15 (10.6)                                                            |          |
| Gender,                  |                                                                  |                                                                      |          |
| Male n (%)               | 195 (60.6)                                                       | 92 (64.8)                                                            | 0.408    |
| Female n (%)             | 127 (39.4)                                                       | 50 (35.2)                                                            |          |
| Risk group,              |                                                                  |                                                                      |          |
| SR n (%)                 | 117 (36.3)                                                       | 65 (45.8)                                                            | 0.063    |
| IR n (%)                 | 205 (63.7)                                                       | 77 (54.2)                                                            |          |
| WBC,                     |                                                                  |                                                                      |          |
| < $50 \times 10^9$ n (%) | 267 (82.9)                                                       | 124 (87.3)                                                           | 0.269    |
| ≥ $50 \times 10^9$ n (%) | 55 (17.1)                                                        | 18 (12.7)                                                            |          |
| Immunophenotype          |                                                                  |                                                                      |          |
| B-ALL n (%)              | 295 (91.6)                                                       | 135 (95.1)                                                           | 0.246    |
| T-ALL n (%)              | 27 (8.4)                                                         | 7 (4.9)                                                              |          |
| 5-year EFS, %            | 89.1±1.8                                                         | 87.6±2.8                                                             | 0.315    |

WBC: white blood cell; SR: standard risk; IR: Intermediate-risk.

**Supplementary Table 2: Genetic polymorphisms and minor allele frequencies**

| SNP (rs#)   | Genes          | Alleles (1/2)* | Position*       | Function*               | MAF  |
|-------------|----------------|----------------|-----------------|-------------------------|------|
| rs11045879  | <i>SLCO1B1</i> | T/C            | chr12: 21229685 | Intron                  | 38.7 |
| rs4149056   | <i>SLCO1B1</i> | T/C            | chr12: 21178615 | missense, Val>Ala       | 11.1 |
| rs2306283   | <i>SLCO1B1</i> | T/C            | chr12:21176804  | missense, Asn>Asp       | 74.0 |
| rs10841753  | <i>SLCO1B1</i> | T/C            | chr12:21168436  | Intron                  | 30.0 |
| rs1051266   | <i>SLC19A1</i> | G/A            | chr21:45537880  | missense, His>Arg       | 46.5 |
| rs3788200   | <i>SLC19A1</i> | G/A            | chr21:45536657  | Intron                  | 46.2 |
| rs1131596   | <i>SLC19A1</i> | C/T            | chr21:45538002  | coding synonym, Ser>Ser | 54.7 |
| rs2838958   | <i>SLC19A1</i> | G/A            | chr21:45528653  | Intron                  | 51.7 |
| rs2032582** | <i>ABCB1</i>   | G/T            | chr7:87531302   | missense, Ser>Thr/Ala   | 48.2 |
| rs1128503   | <i>ABCB1</i>   | T/C            | chr7:87550285   | coding synonym, Gly>Gly | 31.4 |
| rs1045642   | <i>ABCB1</i>   | T/C            | chr7:87509329   | coding synonym, Ile>Ile | 60.8 |
| rs2231137   | <i>ABCG2</i>   | G/A            | Chr4:88139962   | missense, Val>Met       | 29.2 |

\*Position and function according to NCBI GRCh38; 1: major allele; 2: minor allele. \*\* Allele frequency deviates from the Hardy-Weinberg equilibrium. MAF, minor allele frequency.

**Supplementary Table 3: Association of haplotypes with plasma levels of MTX at 48 h from the first MTX infusion**

| Haplotype      |                |                | Estimated frequency (%) | Median (Min-Max) ( $\mu\text{mol/L}$ ) | P     |
|----------------|----------------|----------------|-------------------------|----------------------------------------|-------|
| <i>SLCO1B1</i> | <i>SLCO1B1</i> | <i>SLCO1B1</i> |                         |                                        |       |
| rs10841753     | rs2306283      | rs4149056      |                         |                                        |       |
| T              | C              | T              | 33.2                    | 0.47 (0.09–41.63)                      | 0.051 |
| with           |                |                |                         | 0.34 (0.12–8019)                       |       |
| without        |                |                |                         |                                        |       |
| C              | C              | T              | 30.1                    | 0.41 (0.11–41.63)                      | 0.524 |
| with           |                |                |                         | 0.50 (0.09–34.05)                      |       |
| without        |                |                |                         |                                        |       |
| T              | T              | T              | 25.6                    | 0.46 (0.12–34.05)                      | 0.933 |
| with           |                |                |                         | 0.44 (0.09–41.63)                      |       |
| without        |                |                |                         |                                        |       |
| T              | C              | C              | 10.8                    | 0.5250 (0.12–17.60)                    | 0.388 |
| with           |                |                |                         | 0.41 (0.09–41.63)                      |       |
| without        |                |                |                         |                                        |       |
| <i>SLC19A1</i> | <i>SLC19A1</i> | <i>SLC19A1</i> |                         |                                        |       |
| rs3788200      | rs1051266      | rs1131596      |                         |                                        |       |
| G              | G              | T              | 53.7                    | 0.45(0.09–41.63)                       | 0.467 |
| with           |                |                |                         | 0.48 (0.11–34.05)                      |       |
| without        |                |                |                         |                                        |       |
| A              | A              | C              | 45.5                    | 0.44 (0.09–34.05)                      | 0.356 |
| with           |                |                |                         | 0.60 (0.14–41.63)                      |       |
| without        |                |                |                         |                                        |       |

**Supplementary Table 4: Association of haplotypes with oral mucositis (grade 3–4)**

| <b>Haplotype</b>                         | <b>Chi Square</b> | <b><i>P</i></b> |
|------------------------------------------|-------------------|-----------------|
| SLCO1B1 rs10841753, rs2306283, rs4149056 |                   |                 |
| TCT                                      | 0.998             | 0.318           |
| CCT                                      | 0.355             | 0.551           |
| TTT                                      | 0.508             | 0.476           |
| TCC                                      | 1.723             | 0.189           |
| SLC19A1 rs3788200, rs1051266, rs1131596  |                   |                 |
| GGT                                      | 0.073             | 0.786           |
| AAC                                      | 0.015             | 0.902           |
